# Supplementary material
Source: PubMed Central journal article supplement (PMC7156780)
Supplement: ciz519_suppl_supplementary_material.pdf [file ciz519_suppl_supplementary_material.pdf]

Supplementary Material for

**Potential for point-of-care tests to reduce chlamydia-associated burden in the United States: a mathematical modeling analysis.**

Minttu M. Rönn<sup>1</sup>, Nicolas A. Menzies<sup>1</sup>, Thomas L Giff<sup>2</sup>, Harrell W Chesson<sup>2</sup>, Tom A. Trikalinos<sup>3</sup>,  
Meghan Bellerose<sup>1</sup>, Yelena Malyuta<sup>1</sup>, Andrés Berruti<sup>2</sup>, Charlotte A. Gaydos<sup>4</sup>, Katherine K.  
Hsu<sup>5\*</sup>, Joshua A. Salomon<sup>6,1\*</sup>

**Figure S1.** Impact of POCT in Analysis 1. Outcomes of chlamydia burden among women aged 25-39 presented under different assumptions about POCT sensitivity (varied between 90-99%), proportion of patients treated immediately (30-100%), baseline proportion of LTFU (5-20%) and average baseline delay between testing positive and being treated (1-3 weeks). Prevalence reductions (A) relative to baseline, annual infections (B), and annual PID cases averted (C) are shown. Sample of 8000 simulations is plotted for each scenario.

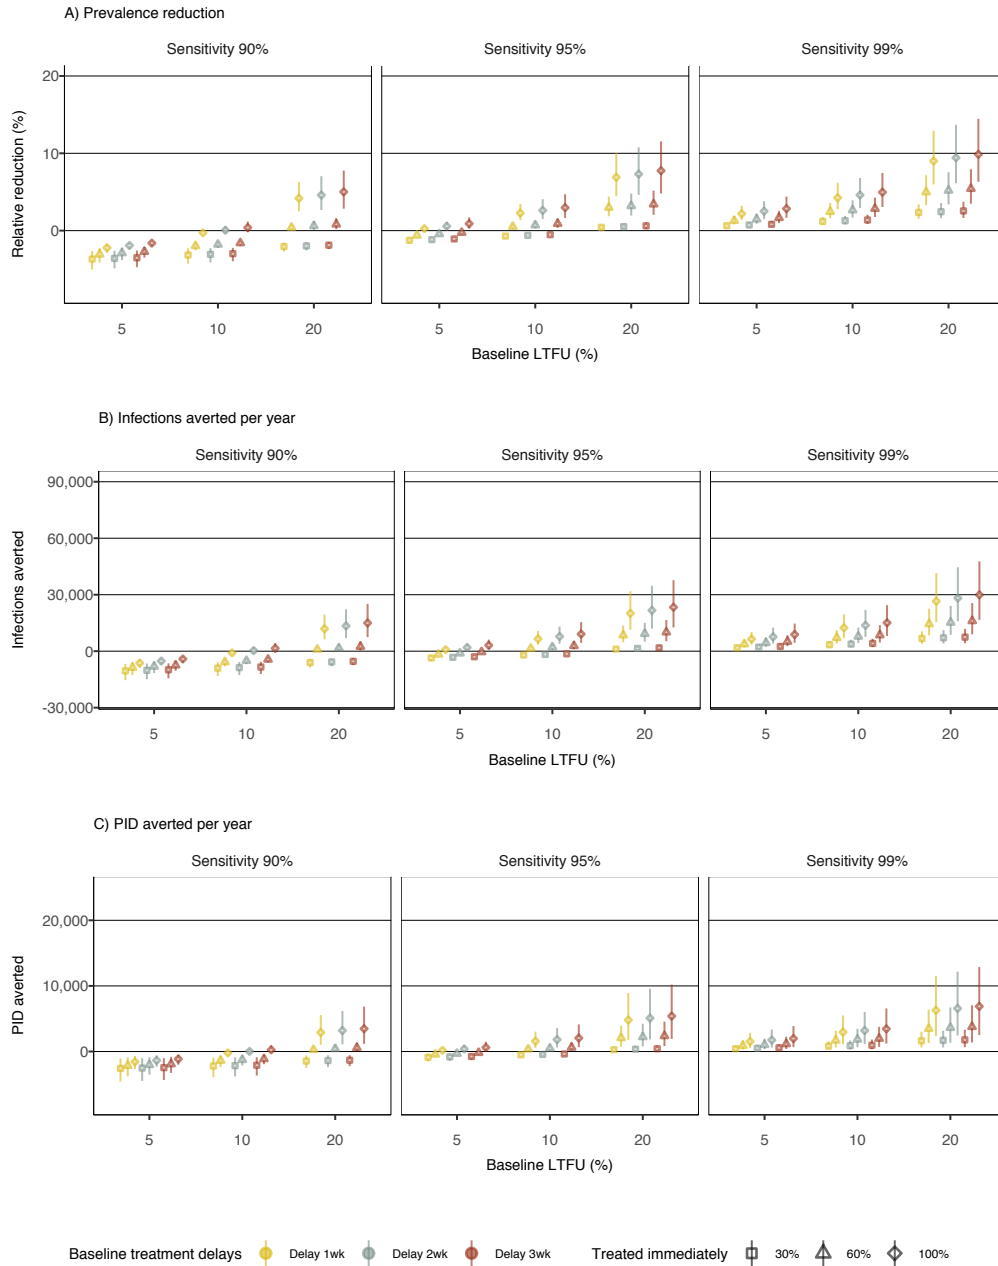

LTFU: Loss to follow up; PID: Pelvic inflammatory disease; POCT: Point-of-care testing; wk: week

**Figure S2.** Impact of POCT in Analysis 1. Outcomes of chlamydia burden among women aged 40-54 presented under different assumptions about POCT sensitivity (varied between 90-99%), proportion of patients treated immediately (30-100%), baseline proportion of LTFU (5-20%) and average baseline delay between testing positive and being treated (1-3 weeks). Prevalence reductions (A) relative to baseline, annual infections (B), and annual PID cases averted (C) are shown. Sample of 8000 simulations is plotted for each scenario.

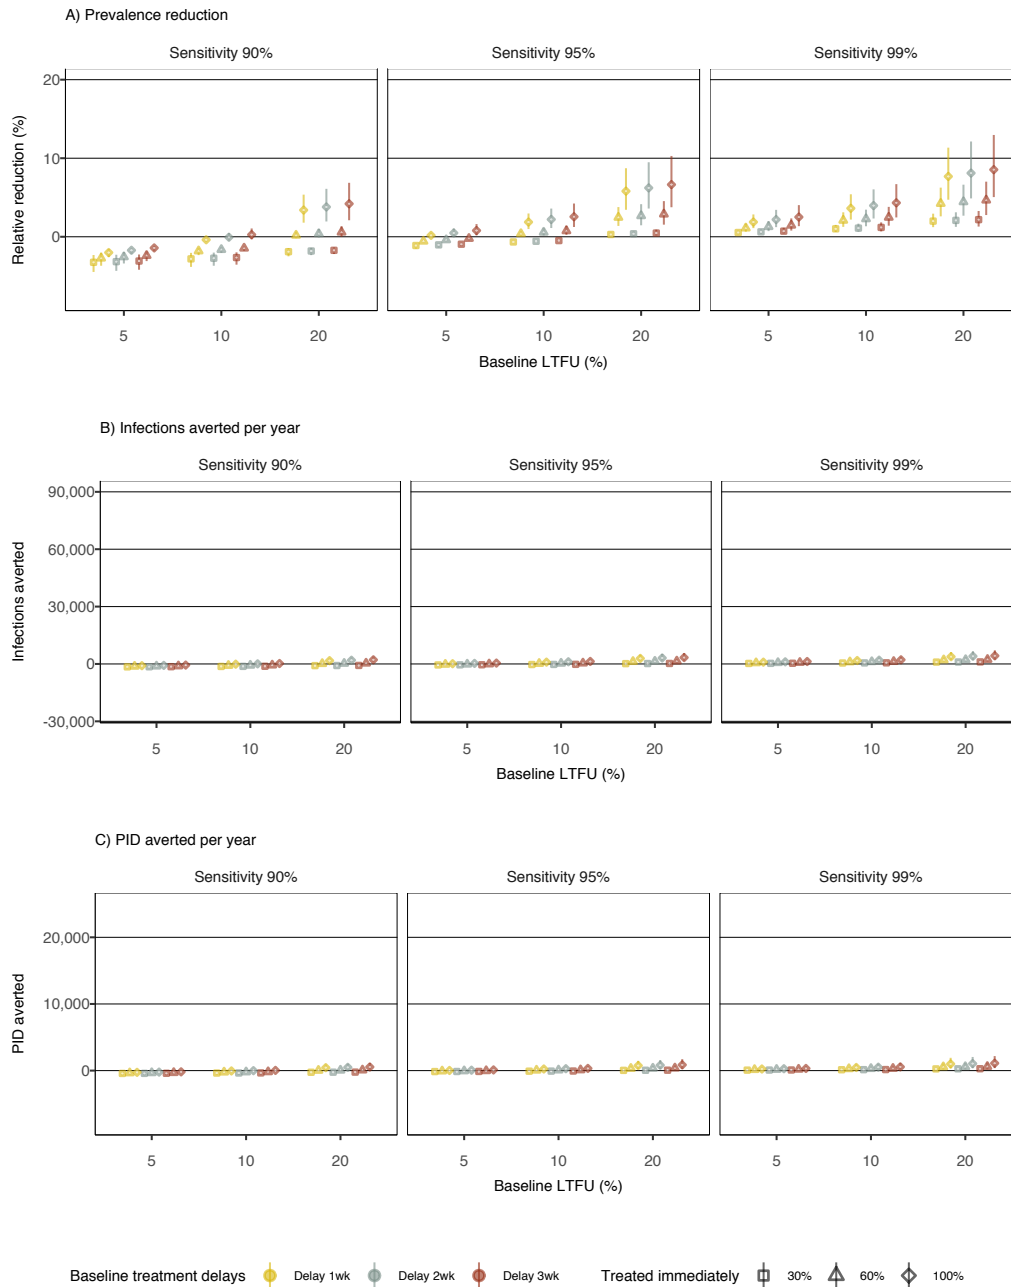

LTFU: Loss to follow up; PID: Pelvic inflammatory disease; POCT: Point-of-care testing; wk: week

**Figure S3.** Impact of POCT if testing frequency is increased by 20% In Analysis 2. Outcomes of chlamydia burden among women aged 25-39 are presented under different assumptions about POCT sensitivity (varied between 90-99%), proportion of patients treated immediately (30-60%), baseline proportion of LTFU (5-20%) and the average baseline delay between testing positive and being treated (1-3 weeks). Prevalence reductions (A) relative to baseline, annual infections (B), and annual PID cases averted (C) are shown. Sample of 8000 simulations is plotted for each scenario.

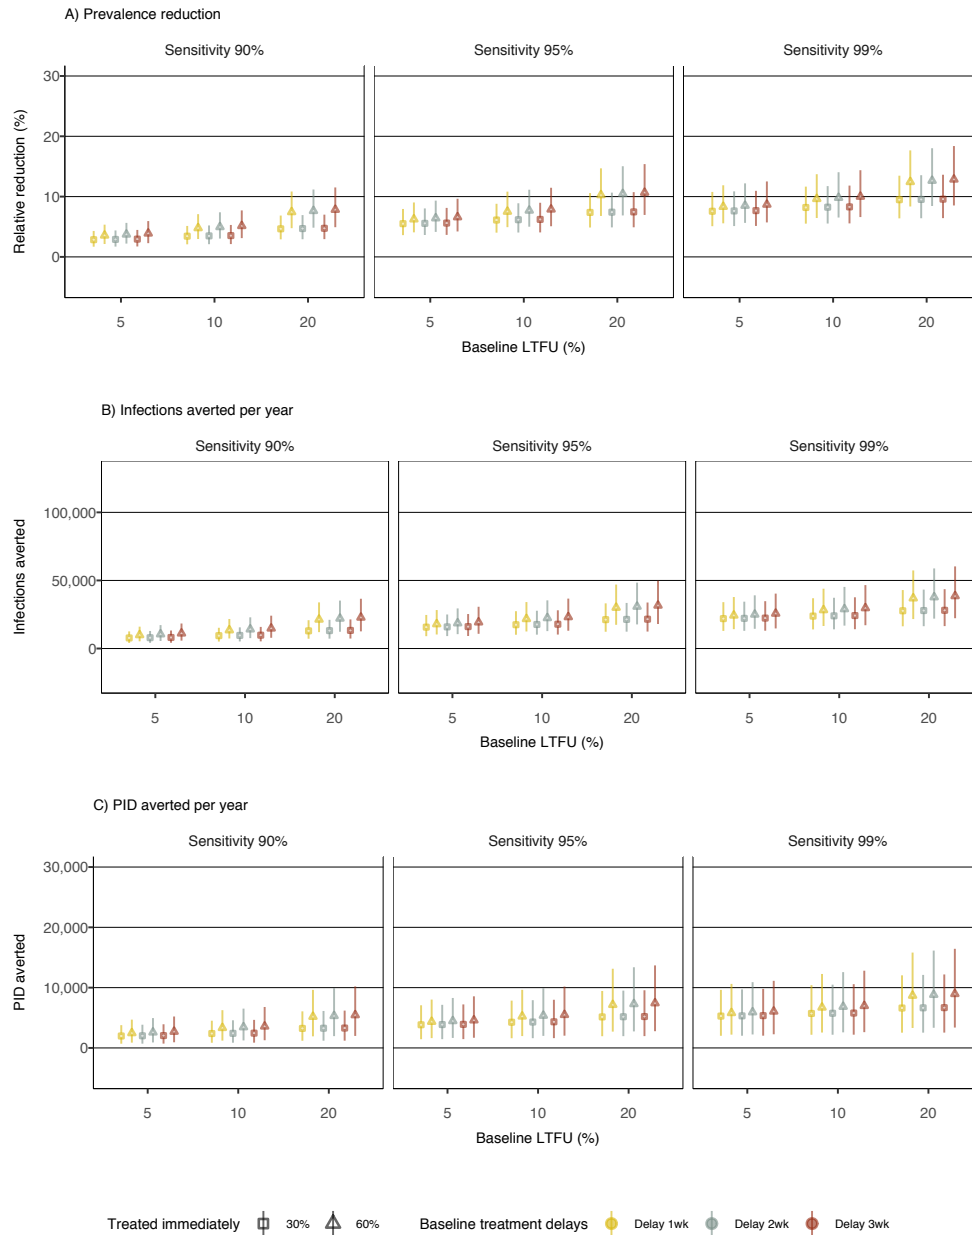

LTFU: Loss to follow up; PID: Pelvic inflammatory disease; POCT: Point-of-care testing; wk: week

**Figure S4.** Impact of POCT if testing frequency is increased by 20% In Analysis 2. Outcomes of chlamydia burden among women aged 40-54 are presented under different assumptions about POCT sensitivity (varied between 90-99%), proportion of patients treated immediately (30-60%), baseline proportion of LTFU (5-20%) and the average baseline delay between testing positive and being treated (1-3 weeks). Prevalence reductions (A) relative to baseline, annual infections (B), and annual PID cases averted (C) are shown. Sample of 8000 simulations is plotted for each scenario.

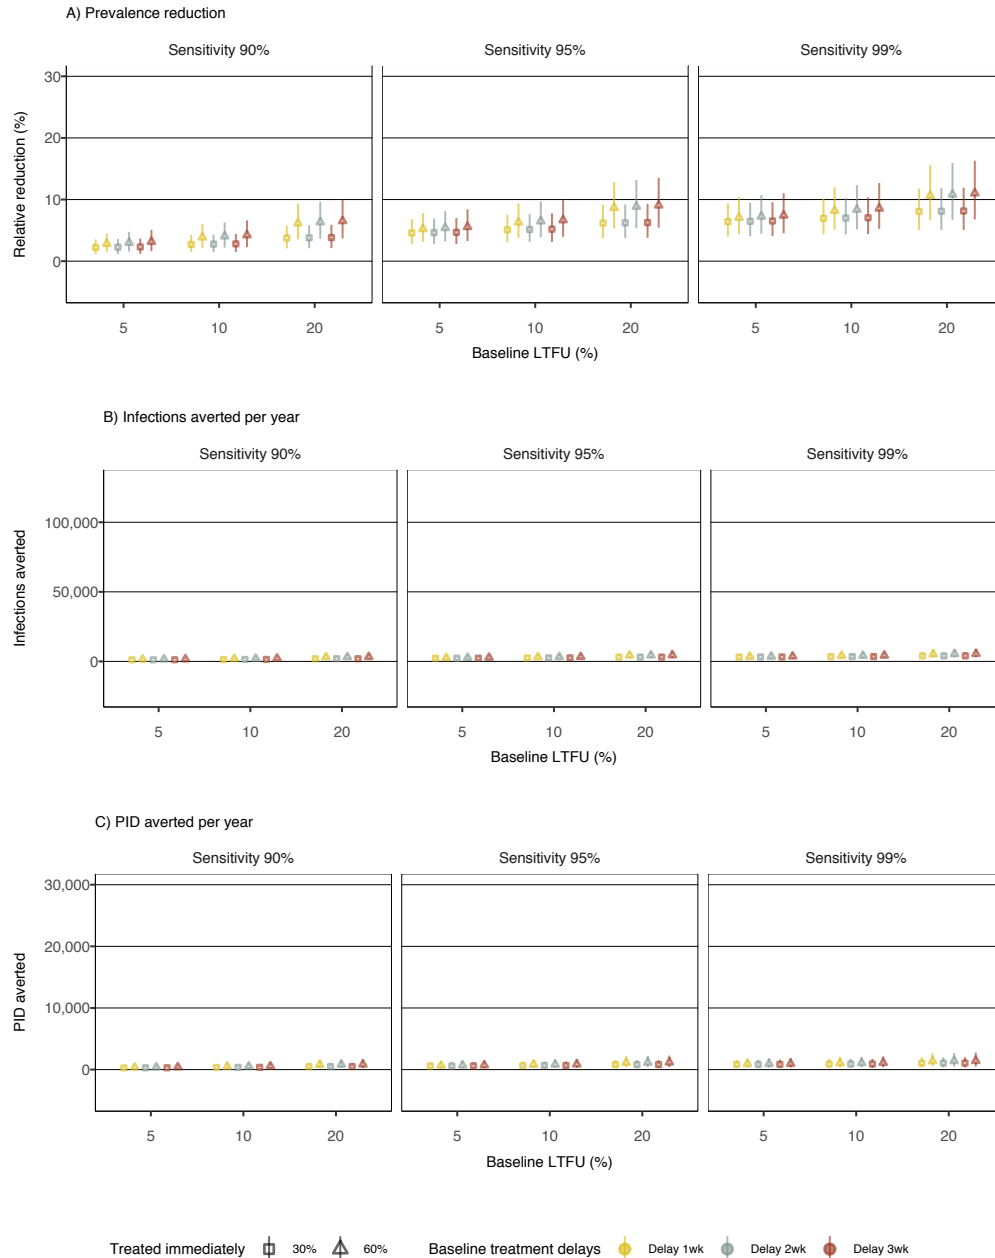

LTFU: Loss to follow up; PID: Pelvic inflammatory disease; POCT: Point-of-care testing; wk: week
